# Supplementary material for: Revealing the effect of grain boundary segregation on Li ion transport in polycrystalline anti-perovskite Li3ClO: a phase field study
Source: Royal Society of Chemistry journal article supplement (doi:10.1039/c9cp06055c), 2020-01-01
Supplement: c9cp06055c1.pdf [file c9cp06055c1.pdf]

# Support information

Table S1 The constructed  $\text{Li}_3\text{OCl}$  GB supercell dimensions

| Structures      | Lattice parameters ( $\text{\AA}$ ) |
|-----------------|-------------------------------------|
| $\Sigma 3(111)$ | $a=5.53, b=5.53, c=54.18$           |
| $\Sigma 3(112)$ | $a=5.53, B=6.77, c=57.46$           |
| $\Sigma 5(210)$ | $a=3.91, b=8.74, c=52.46$           |
| $\Sigma 5(310)$ | $a=3.91, b=12.36, c=49.46$          |

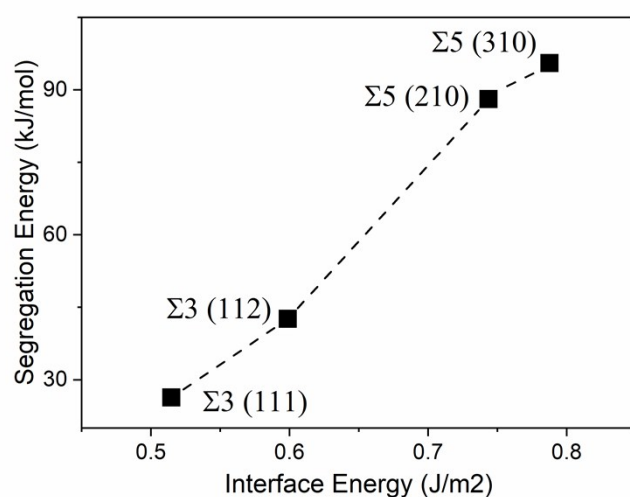

Figure S1 The relationship between segregation energy and interfacial energy for  $\Sigma 3(111)$ ,  $\Sigma 3(112)$ ,  $\Sigma 5(210)$  and  $\Sigma 5(310)$ , where the Li vacancy segregation energy is the chosen as the lowest in each GB structures

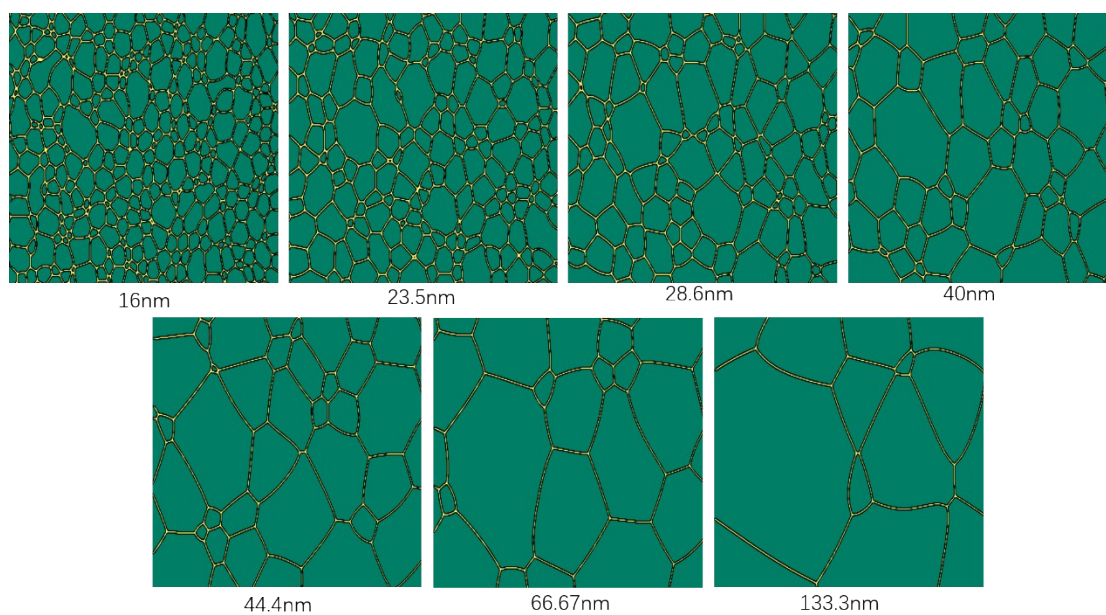

Figure S2 *The Li vacancy distribution in polycrystalline  $\text{Li}_3\text{ClO}$  with different grain sizes with segregation*
